# Supplementary material
Source: Royal Society of Chemistry journal article supplement (doi:10.1039/d6fb00067c)
Supplement: d6fb00067c1.pdf [file d6fb00067c1.pdf]

ARTICLE

Supplementary Information

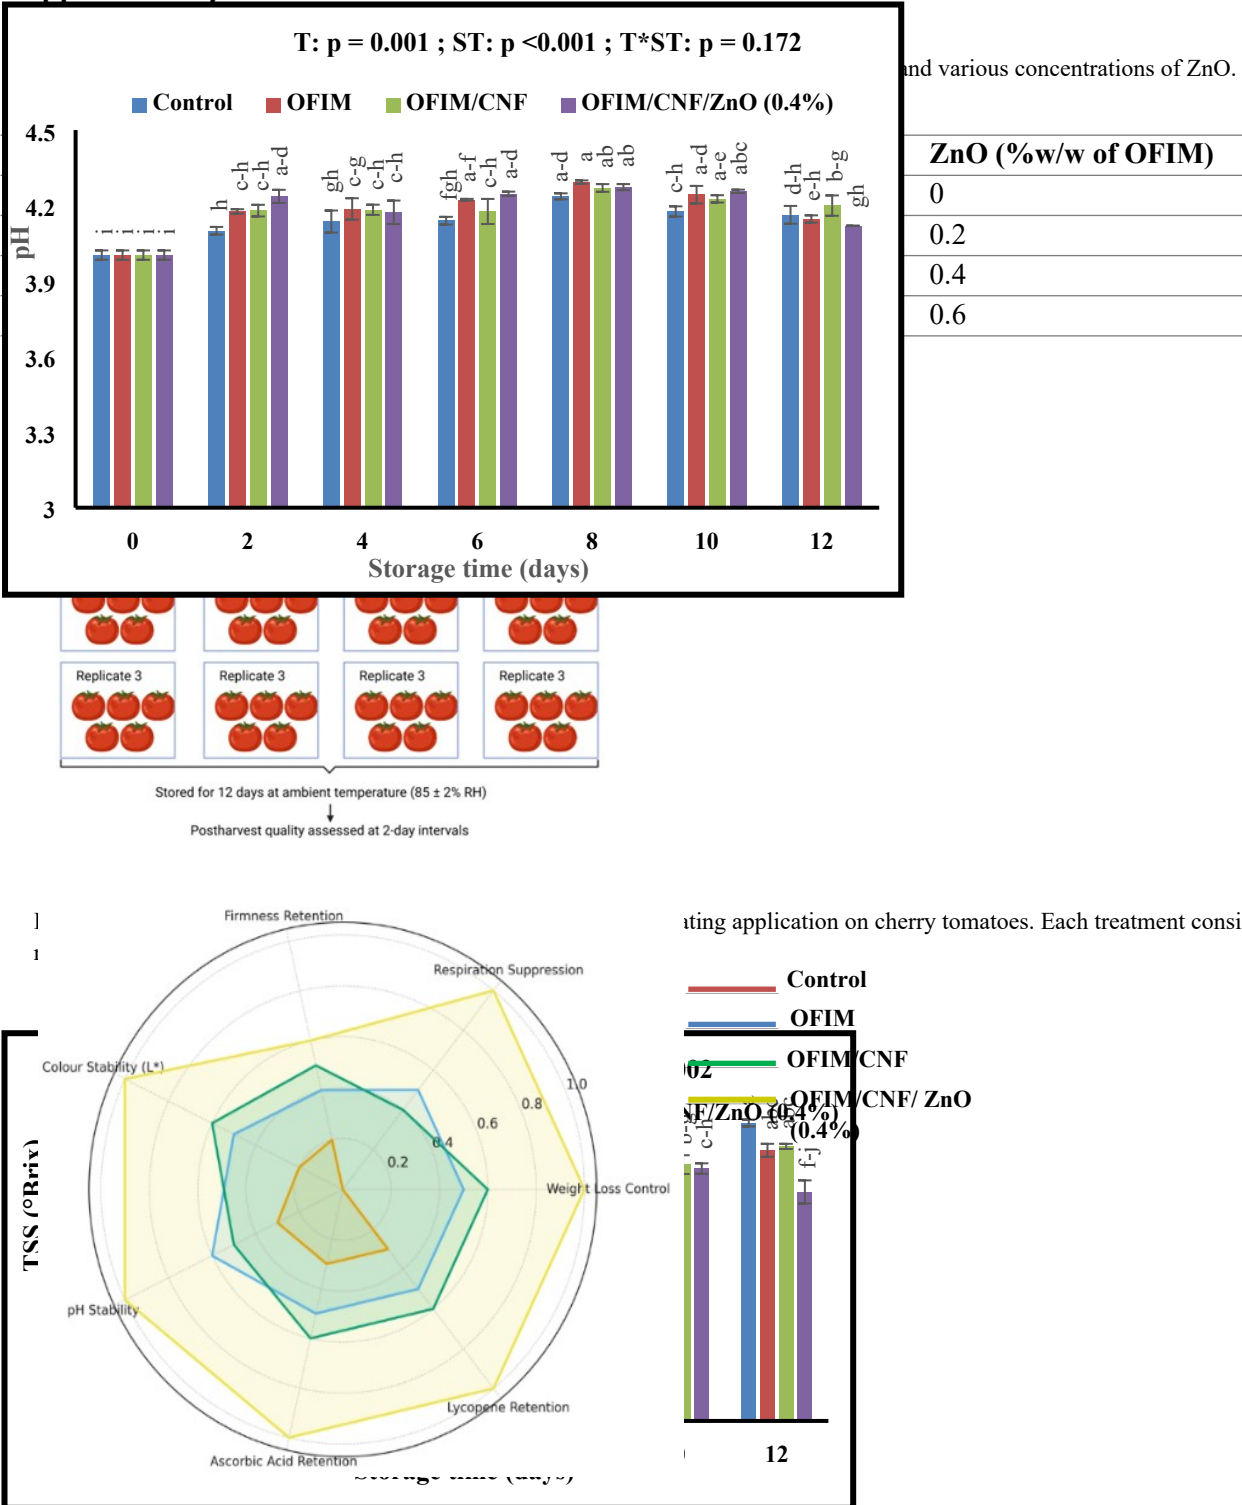

**Figure S2.** The effect of *Opuntia ficus-indica* mucilage-based coatings on the total soluble solids content of cherry tomatoes stored at ambient temperature (23 ± 2 °C). Vertical bars represent the standard errors of the mean values. T: treatment; ST: storage time; T\* ST: interaction between treatment and storage time. OFIM: *Opuntia ficus-indica*. CNF: cellulose nanofiber. ZnO: zinc oxide NPs.
